# Supplementary material for: The equation of state of hard-spherocylinder fluid mixturesElectronic Supplementary Information available. See http://www.rsc.org/suppdata/cp/b1/b109010k/
Source: Royal Society of Chemistry journal article supplement (doi:10.1039/b109010k), 2002-01-08
Supplement: tables.doc [file tables.doc]

**Table 1**. Monte Carlo simulation results for binary mixtures of hard spheres with hard prolate spherocylinders. The reduced pressure, *P**=(*xivi*)/k*T*, is fixed. The estimated error in the packing fraction, **, is about 1.3% of the encountered value.

| **1 | **2 | *v*2/*v*1 | *x*1 | *P** | ** |
| --- | --- | --- | --- | --- | --- |
| 1.0 | 2.5 | 1.0 | 0.50 | 0.1595 | 0.1002 |
| 1.0 | 2.5 | 1.0 | 0.50 | 0.5244 | 0.2003 |
| 1.0 | 2.5 | 1.0 | 0.50 | 1.3355 | 0.2991 |
| 1.0 | 2.5 | 1.0 | 0.50 | 3.1548 | 0.3996 |
| 1.0 | 2.5 | 1.5 | 0.50 | 0.1596 | 0.1000 |
| 1.0 | 2.5 | 1.5 | 0.50 | 0.5241 | 0.2001 |
| 1.0 | 2.5 | 1.5 | 0.50 | 1.3335 | 0.2986 |
| 1.0 | 2.5 | 1.5 | 0.50 | 3.1466 | 0.3981 |
| 1.0 | 2.5 | 3.0 | 0.50 | 0.1575 | 0.0999 |
| 1.0 | 2.5 | 3.0 | 0.50 | 0.5146 | 0.1987 |
| 1.0 | 2.5 | 3.0 | 0.50 | 1.3020 | 0.2978 |
| 1.0 | 2.5 | 3.0 | 0.50 | 3.0552 | 0.3975 |
| 1.0 | 2.5 | 6.5 | 0.50 | 0.1546 | 0.0999 |
| 1.0 | 2.5 | 6.5 | 0.50 | 0.4968 | 0.2005 |
| 1.0 | 2.5 | 6.5 | 0.50 | 1.2437 | 0.2989 |
| 1.0 | 2.5 | 6.5 | 0.50 | 2.8973 | 0.3993 |
| 1.0 | 2.5 | 10.0 | 0.50 | 0.1529 | 0.1003 |
| 1.0 | 2.5 | 10.0 | 0.50 | 0.4868 | 0.1978 |
| 1.0 | 2.5 | 10.0 | 0.50 | 1.2106 | 0.2987 |
| 1.0 | 2.5 | 10.0 | 0.50 | 2.8087 | 0.4013 |
| 1.0 | 4.0 | 1.0 | 0.50 | 0.1635 | 0.0980 |
| 1.0 | 4.0 | 1.0 | 0.50 | 0.5159 | 0.1896 |
| 1.0 | 4.0 | 1.0 | 0.50 | 1.4186 | 0.2922 |
| 1.0 | 4.0 | 1.0 | 0.50 | 3.3101 | 0.3891 |
| 1.0 | 4.0 | 1.5 | 0.50 | 0.1692 | 0.0997 |
| 1.0 | 4.0 | 1.5 | 0.50 | 0.5807 | 0.1997 |
| 1.0 | 4.0 | 1.5 | 0.50 | 1.5175 | 0.2983 |
| 1.0 | 4.0 | 1.5 | 0.50 | 3.6176 | 0.3978 |
| 1.0 | 4.0 | 3.0 | 0.50 | 0.1730 | 0.1013 |
| 1.0 | 4.0 | 3.0 | 0.50 | 0.5463 | 0.1936 |
| 1.0 | 4.0 | 3.0 | 0.50 | 1.5018 | 0.2978 |
| 1.0 | 4.0 | 3.0 | 0.50 | 3.5045 | 0.3959 |
| 1.0 | 4.0 | 6.5 | 0.50 | 0.1659 | 0.1001 |
| 1.0 | 4.0 | 6.5 | 0.50 | 0.5634 | 0.1986 |
| 1.0 | 4.0 | 6.5 | 0.50 | 1.4678 | 0.3004 |
| 1.0 | 4.0 | 6.5 | 0.50 | 3.5084 | 0.4005 |
| 1.0 | 4.0 | 10.0 | 0.50 | 0.1684 | 0.1014 |
| 1.0 | 4.0 | 10.0 | 0.50 | 0.5317 | 0.1960 |
| 1.0 | 4.0 | 10.0 | 0.50 | 1.4617 | 0.3032 |
| 1.0 | 4.0 | 10.0 | 0.50 | 3.4097 | 0.4029 |
| 2.5 | 1.0 | 1.5 | 0.50 | 0.1584 | 0.0999 |

**Table 1** (cont'd)

| **1 | **2 | *v*2/*v*1 | *x*1 | *P** | ** |
| --- | --- | --- | --- | --- | --- |
| 2.5 | 1.0 | 1.5 | 0.50 | 0.5178 | 0.2004 |
| 2.5 | 1.0 | 1.5 | 0.50 | 1.3142 | 0.2991 |
| 2.5 | 1.0 | 1.5 | 0.50 | 3.0980 | 0.3984 |
| 2.5 | 1.0 | 3.0 | 0.50 | 0.1537 | 0.0999 |
| 2.5 | 1.0 | 3.0 | 0.50 | 0.4909 | 0.1994 |
| 2.5 | 1.0 | 3.0 | 0.50 | 1.2233 | 0.2980 |
| 2.5 | 1.0 | 3.0 | 0.50 | 2.8487 | 0.3987 |
| 2.5 | 1.0 | 6.5 | 0.50 | 0.1472 | 0.0993 |
| 2.5 | 1.0 | 6.5 | 0.50 | 0.4515 | 0.1976 |
| 2.5 | 1.0 | 6.5 | 0.50 | 1.0902 | 0.2949 |
| 2.5 | 1.0 | 6.5 | 0.50 | 2.4789 | 0.3931 |
| 2.5 | 1.0 | 10.0 | 0.50 | 0.1435 | 0.0986 |
| 2.5 | 1.0 | 10.0 | 0.50 | 0.4298 | 0.1952 |
| 2.5 | 1.0 | 10.0 | 0.50 | 1.0166 | 0.2918 |
| 2.5 | 1.0 | 10.0 | 0.50 | 2.2727 | 0.3893 |
| 4.0 | 1.0 | 1.5 | 0.50 | 0.1675 | 0.1004 |
| 4.0 | 1.0 | 1.5 | 0.50 | 0.5707 | 0.2006 |
| 4.0 | 1.0 | 1.5 | 0.50 | 1.4875 | 0.3010 |
| 4.0 | 1.0 | 1.5 | 0.50 | 3.5521 | 0.4010 |
| 4.0 | 1.0 | 3.0 | 0.50 | 0.1639 | 0.1016 |
| 4.0 | 1.0 | 3.0 | 0.50 | 0.5499 | 0.2039 |
| 4.0 | 1.0 | 3.0 | 0.50 | 1.4223 | 0.3045 |
| 4.0 | 1.0 | 3.0 | 0.50 | 3.3932 | 0.4072 |
| 4.0 | 1.0 | 6.5 | 0.50 | 0.1527 | 0.0995 |
| 4.0 | 1.0 | 6.5 | 0.50 | 0.4847 | 0.1993 |
| 4.0 | 1.0 | 6.5 | 0.50 | 1.2034 | 0.2978 |
| 4.0 | 1.0 | 6.5 | 0.50 | 2.7934 | 0.3978 |
| 4.0 | 1.0 | 10.0 | 0.50 | 0.1569 | 0.1034 |
| 4.0 | 1.0 | 10.0 | 0.50 | 0.5101 | 0.2089 |
| 4.0 | 1.0 | 10.0 | 0.50 | 1.2914 | 0.3136 |
| 4.0 | 1.0 | 10.0 | 0.50 | 3.0474 | 0.4182 |
| 1.0 | 4.0 | 10.0 | 0.91 | 0.1478 | 0.0990 |
| 1.0 | 4.0 | 10.0 | 0.91 | 0.4558 | 0.1979 |
| 1.0 | 4.0 | 10.0 | 0.91 | 1.1039 | 0.2939 |
| 1.0 | 4.0 | 10.0 | 0.91 | 2.5133 | 0.3948 |
| 1.0 | 3.0 | 10.0 | 0.91 | 0.1448 | 0.0989 |
| 1.0 | 3.0 | 10.0 | 0.91 | 0.4372 | 0.1957 |
| 1.0 | 3.0 | 10.0 | 0.91 | 1.0403 | 0.2919 |
| 1.0 | 3.0 | 10.0 | 0.91 | 2.3351 | 0.3897 |
| 1.0 | 2.0 | 10.0 | 0.91 | 0.1416 | 0.0985 |
| 1.0 | 2.0 | 10.0 | 0.91 | 0.4191 | 0.1943 |
| 1.0 | 2.0 | 10.0 | 0.91 | 0.9783 | 0.2902 |
| 1.0 | 2.0 | 10.0 | 0.91 | 2.1582 | 0.3865 |

**Table 2**. Monte Carlo simulation results for binary mixtures of hard prolate spherocylinders. The reduced pressure, *P**=(*xivi*)/k*T*, is fixed. The estimated error in the packing fraction, **, is about 1.3% of the encountered value.

| **1 | **2 | *v*2/*v*1 | *xi* | *P** | ** |
| --- | --- | --- | --- | --- | --- |
| 2.5 | 2.5 | 1.5 | 0.5 | 0.1670 | 0.0998 |
| 2.5 | 2.5 | 1.5 | 0.5 | 0.5685 | 0.1997 |
| 2.5 | 2.5 | 1.5 | 0.5 | 1.4804 | 0.2995 |
| 2.5 | 2.5 | 1.5 | 0.5 | 3.5349 | 0.3996 |
| 2.5 | 2.5 | 3.0 | 0.5 | 0.1652 | 0.1007 |
| 2.5 | 2.5 | 3.0 | 0.5 | 0.5581 | 0.2011 |
| 2.5 | 2.5 | 3.0 | 0.5 | 1.4470 | 0.3019 |
| 2.5 | 2.5 | 3.0 | 0.5 | 3.4469 | 0.4031 |
| 2.5 | 2.5 | 6.5 | 0.5 | 0.1572 | 0.0993 |
| 2.5 | 2.5 | 6.5 | 0.5 | 0.5113 | 0.1978 |
| 2.5 | 2.5 | 6.5 | 0.5 | 1.2938 | 0.2975 |
| 2.5 | 2.5 | 6.5 | 0.5 | 3.0402 | 0.3971 |
| 2.5 | 2.5 | 10.0 | 0.5 | 0.1599 | 0.1017 |
| 2.5 | 2.5 | 10.0 | 0.5 | 0.5275 | 0.2047 |
| 2.5 | 2.5 | 10.0 | 0.5 | 1.3491 | 0.3071 |
| 2.5 | 2.5 | 10.0 | 0.5 | 3.1945 | 0.4095 |
| 2.5 | 4.0 | 1.0 | 0.50 | 0.1782 | 0.1002 |
| 2.5 | 4.0 | 1.0 | 0.50 | 0.6330 | 0.2005 |
| 2.5 | 4.0 | 1.0 | 0.50 | 1.6886 | 0.3002 |
| 2.5 | 4.0 | 1.0 | 0.50 | 4.0581 | 0.4006 |
| 2.5 | 4.0 | 1.5 | 0.50 | 0.1785 | 0.1001 |
| 2.5 | 4.0 | 1.5 | 0.50 | 0.6353 | 0.2015 |
| 2.5 | 4.0 | 1.5 | 0.50 | 1.6957 | 0.3005 |
| 2.5 | 4.0 | 1.5 | 0.50 | 4.0771 | 0.4005 |
| 2.5 | 4.0 | 3.0 | 0.50 | 0.1762 | 0.1003 |
| 2.5 | 4.0 | 3.0 | 0.50 | 0.6220 | 0.2005 |
| 2.5 | 4.0 | 3.0 | 0.50 | 1.6560 | 0.3006 |
| 2.5 | 4.0 | 3.0 | 0.50 | 3.9857 | 0.4009 |
| 2.5 | 4.0 | 6.5 | 0.50 | 0.1706 | 0.1002 |
| 2.5 | 4.0 | 6.5 | 0.50 | 0.5918 | 0.2000 |
| 2.5 | 4.0 | 6.5 | 0.50 | 1.5625 | 0.3013 |
| 2.5 | 4.0 | 6.5 | 0.50 | 3.7585 | 0.4031 |
| 2.5 | 4.0 | 10.0 | 0.50 | 0.1673 | 0.0999 |
| 2.5 | 4.0 | 10.0 | 0.50 | 0.5728 | 0.1998 |
| 2.5 | 4.0 | 10.0 | 0.50 | 1.5018 | 0.2991 |
| 2.5 | 4.0 | 10.0 | 0.50 | 3.6071 | 0.4052 |
| 4.0 | 2.5 | 1.5 | 0.50 | 0.1764 | 0.1001 |
| 4.0 | 2.5 | 1.5 | 0.50 | 0.6233 | 0.2006 |
| 4.0 | 2.5 | 1.5 | 0.50 | 1.6576 | 0.3004 |

**Table 2** (cont'd)

| **1 | **2 | *v*2/*v*1 | *xi* | *P** | ** |
| --- | --- | --- | --- | --- | --- |
| 4.0 | 2.5 | 1.5 | 0.50 | 3.9815 | 0.4008 |
| 4.0 | 2.5 | 3.0 | 0.50 | 0.1710 | 0.1001 |
| 4.0 | 2.5 | 3.0 | 0.50 | 0.5917 | 0.1997 |
| 4.0 | 2.5 | 3.0 | 0.50 | 1.5577 | 0.2999 |
| 4.0 | 2.5 | 3.0 | 0.50 | 3.7339 | 0.4021 |
| 4.0 | 2.5 | 6.5 | 0.50 | 0.1630 | 0.0996 |
| 4.0 | 2.5 | 6.5 | 0.50 | 0.5469 | 0.1996 |
| 4.0 | 2.5 | 6.5 | 0.50 | 1.4119 | 0.2990 |
| 4.0 | 2.5 | 6.5 | 0.50 | 3.3586 | 0.4017 |
| 4.0 | 2.5 | 10.0 | 0.50 | 0.1587 | 0.0994 |
| 4.0 | 2.5 | 10.0 | 0.50 | 0.5217 | 0.1988 |
| 4.0 | 2.5 | 10.0 | 0.50 | 1.3305 | 0.2996 |
| 4.0 | 2.5 | 10.0 | 0.50 | 3.1439 | 0.4006 |
| 4.0 | 4.0 | 1.5 | 0.50 | 0.1883 | 0.1004 |
| 4.0 | 4.0 | 1.5 | 0.50 | 0.6922 | 0.2004 |
| 4.0 | 4.0 | 1.5 | 0.50 | 1.8756 | 0.3000 |
| 4.0 | 4.0 | 1.5 | 0.50 | 4.5116 | 0.4021 |
| 4.0 | 4.0 | 3.0 | 0.50 | 0.1866 | 0.1014 |
| 4.0 | 4.0 | 3.0 | 0.50 | 0.6834 | 0.2034 |
| 4.0 | 4.0 | 3.0 | 0.50 | 1.8529 | 0.3051 |
| 4.0 | 4.0 | 3.0 | 0.50 | 4.4742 | 0.4092 |
| 4.0 | 4.0 | 6.5 | 0.50 | 0.1771 | 0.1002 |
| 4.0 | 4.0 | 6.5 | 0.50 | 0.6288 | 0.2011 |
| 4.0 | 4.0 | 6.5 | 0.50 | 1.6852 | 0.3031 |
| 4.0 | 4.0 | 6.5 | 0.50 | 4.0788 | 0.4065 |
| 4.0 | 4.0 | 10.0 | 0.50 | 0.1812 | 0.1029 |
| 4.0 | 4.0 | 10.0 | 0.50 | 0.6556 | 0.2078 |
| 4.0 | 4.0 | 10.0 | 0.50 | 1.7773 | 0.3128 |
| 4.0 | 4.0 | 10.0 | 0.50 | 4.3355 | 0.4206 |
| 2.0 | 4.0 | 10.0 | 0.91 | 0.1540 | 0.0992 |
| 2.0 | 4.0 | 10.0 | 0.91 | 0.4925 | 0.1986 |
| 2.0 | 4.0 | 10.0 | 0.91 | 1.2299 | 0.2965 |
| 2.0 | 4.0 | 10.0 | 0.91 | 2.8645 | 0.3984 |
| 3.0 | 4.0 | 10.0 | 0.91 | 0.1632 | 0.0998 |
| 3.0 | 4.0 | 10.0 | 0.91 | 0.5475 | 0.1999 |
| 3.0 | 4.0 | 10.0 | 0.91 | 1.4166 | 0.2995 |
| 3.0 | 4.0 | 10.0 | 0.91 | 3.3769 | 0.4024 |
| 2.0 | 3.0 | 10.0 | 0.91 | 0.1508 | 0.0990 |
| 2.0 | 3.0 | 10.0 | 0.91 | 0.4735 | 0.1968 |
| 2.0 | 3.0 | 10.0 | 0.91 | 1.1647 | 0.2947 |
| 2.0 | 3.0 | 10.0 | 0.91 | 2.6836 | 0.3964 |
